# Supplementary material for: Clinical impact of changes in mitral regurgitation severity after medical therapy optimization in heart failure
Source: Springer Nature journal article supplement (doi:10.1007/s00392-022-01991-7), 2022-03-16
Supplement: MOESM1 [file 392_2022_1991_MOESM1_ESM.pdf]

**SUPPLEMENTARY APPENDIX**

**Supplementary Table 1 – Clinical characteristics according to baseline and 9-month moderate-severe MR**

|                                   | No or Mild MR at Baseline and 9-month – Unchanged (n=470) | Moderate or Severe MR at Baseline, No or Mild MR at 9-month – Improved (n=192) | No or Mild MR at Baseline, Moderate or Severe MR at 9-month – Worsened (n=90) | Moderate or Severe MR at Baseline and 9-month – Unchanged (n=270) | <i>p</i> -value  |
|-----------------------------------|-----------------------------------------------------------|--------------------------------------------------------------------------------|-------------------------------------------------------------------------------|-------------------------------------------------------------------|------------------|
| Age (years)                       | 66.1 ± 12.7                                               | 64.8 ± 12.1                                                                    | 71.4 ± 10.0                                                                   | 68.4 ± 11.4                                                       | <b>&lt;0.001</b> |
| Men                               | 371 (78.9)                                                | 142 (74.0)                                                                     | 65 (72.2)                                                                     | 208 (77.0)                                                        | 0.370            |
| BMI (kg/m <sup>2</sup> )          | 28.7 ± 5.8                                                | 27.2 ± 5.4                                                                     | 26.3 ± 4.8                                                                    | 27.2 ± 4.6                                                        | <b>&lt;0.001</b> |
| HF hospitalization in last year   | 121 (25.7)                                                | 51 (26.6)                                                                      | 29 (32.2)                                                                     | 83 (30.7)                                                         | 0.365            |
| Primary ischemic HF etiology      | 207 (44.6)                                                | 67 (35.6)                                                                      | 47 (52.2)                                                                     | 121 (45.7)                                                        | <b>0.043</b>     |
| Medical history (baseline)        |                                                           |                                                                                |                                                                               |                                                                   |                  |
| Hypertension                      | 299 (63.6)                                                | 109 (56.8)                                                                     | 53 (58.9)                                                                     | 168 (62.2)                                                        | 0.388            |
| Diabetes mellitus                 | 139 (29.6)                                                | 47 (24.5)                                                                      | 23 (25.6)                                                                     | 76 (28.2)                                                         | 0.567            |
| Atrial fibrillation               | 184 (39.2)                                                | 71 (37.0)                                                                      | 36 (40.0)                                                                     | 119 (44.1)                                                        | 0.435            |
| Myocardial infarction             | 170 (36.2)                                                | 60 (31.3)                                                                      | 43 (47.8)                                                                     | 96 (35.6)                                                         | 0.063            |
| PCI                               | 108 (23.0)                                                | 38 (19.8)                                                                      | 23 (25.6)                                                                     | 38 (14.1)                                                         | <b>0.017</b>     |
| CABG                              | 71 (15.1)                                                 | 19 (9.9)                                                                       | 19 (21.1)                                                                     | 40 (14.8)                                                         | 0.086            |
| Prior valve surgery               | 39 (8.3)                                                  | 14 (7.3)                                                                       | 4 (4.4)                                                                       | 17 (6.3)                                                          | 0.534            |
| Peripheral artery disease         | 43 (9.2)                                                  | 16 (8.3)                                                                       | 4 (4.4)                                                                       | 27 (10.0)                                                         | 0.435            |
| COPD                              | 76 (16.2)                                                 | 26 (13.5)                                                                      | 14 (15.6)                                                                     | 38 (14.1)                                                         | 0.796            |
| Stroke                            | 44 (9.4)                                                  | 16 (8.3)                                                                       | 6 (6.7)                                                                       | 27 (10.0)                                                         | 0.781            |
| Current malignancy                | 13 (2.8)                                                  | 2 (1.0)                                                                        | 5 (5.6)                                                                       | 7 (2.6)                                                           | 0.178            |
| CKD                               | 95 (20.2)                                                 | 39 (20.3)                                                                      | 24 (26.7)                                                                     | 73 (27.0)                                                         | 0.112            |
| Device therapy                    |                                                           |                                                                                |                                                                               |                                                                   | 0.055            |
| Pacemaker                         | 31 (6.6)                                                  | 6 (3.1)                                                                        | 6 (6.7)                                                                       | 24 (8.9)                                                          |                  |
| ICD                               | 32 (6.8)                                                  | 7 (3.7)                                                                        | 8 (8.9)                                                                       | 20 (7.4)                                                          |                  |
| CRT-P                             | 6 (1.3)                                                   | 5 (2.6)                                                                        | 1 (1.1)                                                                       | 7 (2.6)                                                           |                  |
| CRT-D                             | 27 (5.7)                                                  | 11 (5.7)                                                                       | 8 (8.9)                                                                       | 25 (9.3)                                                          |                  |
| Type of baseline visit            |                                                           |                                                                                |                                                                               |                                                                   | 0.667            |
| Inpatient hospitalization         | 284 (60.4)                                                | 123 (64.1)                                                                     | 51 (56.7)                                                                     | 159 (58.9)                                                        |                  |
| Outpatient clinic                 | 186 (39.6)                                                | 69 (35.9)                                                                      | 39 (43.3)                                                                     | 111 (41.1)                                                        |                  |
| Reason for baseline visit         |                                                           |                                                                                |                                                                               |                                                                   | <b>&lt;0.001</b> |
| Worsening HF                      | 190 (40.4)                                                | 69 (35.9)                                                                      | 44 (48.9)                                                                     | 141 (52.2)                                                        |                  |
| New-onset HF                      | 160 (34.0)                                                | 75 (39.1)                                                                      | 19 (21.1)                                                                     | 57 (21.1)                                                         |                  |
| Other                             | 120 (25.5)                                                | 48 (25.0)                                                                      | 27 (30.0)                                                                     | 72 (26.7)                                                         |                  |
| NYHA class                        |                                                           |                                                                                |                                                                               |                                                                   | 0.056            |
| Baseline                          |                                                           |                                                                                |                                                                               |                                                                   |                  |
| I                                 | 17 (3.7)                                                  | 3 (1.6)                                                                        | 1 (1.1)                                                                       | 3 (1.1)                                                           |                  |
| II                                | 219 (47.6)                                                | 79 (42.5)                                                                      | 37 (41.6)                                                                     | 119 (44.4)                                                        |                  |
| III                               | 193 (42.0)                                                | 78 (41.9)                                                                      | 44 (49.4)                                                                     | 121 (45.2)                                                        |                  |
| IV                                | 31 (6.7)                                                  | 26 (14.0)                                                                      | 7 (7.9)                                                                       | 25 (9.3)                                                          |                  |
| 9-month                           |                                                           |                                                                                |                                                                               |                                                                   | <b>&lt;0.001</b> |
| I                                 | 95 (20.7)                                                 | 57 (31.3)                                                                      | 10 (11.2)                                                                     | 28 (10.7)                                                         |                  |
| II                                | 269 (58.6)                                                | 91 (50.0)                                                                      | 49 (55.1)                                                                     | 160 (61.1)                                                        |                  |
| III                               | 89 (19.4)                                                 | 33 (18.1)                                                                      | 28 (31.5)                                                                     | 69 (26.3)                                                         |                  |
| IV                                | 6 (1.3)                                                   | 1 (0.6)                                                                        | 2 (2.3)                                                                       | 5 (1.9)                                                           |                  |
| SBP                               |                                                           |                                                                                |                                                                               |                                                                   |                  |
| Baseline                          | 127 ± 22                                                  | 125 ± 21                                                                       | 125 ± 25                                                                      | 122 ± 19                                                          | <b>0.028</b>     |
| 9-month                           | 127 ± 22                                                  | 127 ± 20                                                                       | 118 ± 20                                                                      | 121 ± 20                                                          | <b>&lt;0.001</b> |
| HF therapy                        |                                                           |                                                                                |                                                                               |                                                                   |                  |
| ACEi/ARB                          |                                                           |                                                                                |                                                                               |                                                                   |                  |
| Baseline use                      | 380 (80.9)                                                | 144 (75.0)                                                                     | 64 (71.1)                                                                     | 214 (79.3)                                                        | 0.115            |
| 3-month use                       | 430 (91.5)                                                | 171 (89.1)                                                                     | 83 (92.2)                                                                     | 250 (92.6)                                                        | 0.593            |
| 3-month target dose               | 139 (29.6)                                                | 60 (31.3)                                                                      | 17 (18.9)                                                                     | 54 (20.0)                                                         | <b>0.005</b>     |
| 3-month optimal dose fraction (%) | 55 ± 41                                                   | 57 ± 43                                                                        | 48 ± 39                                                                       | 48 ± 36                                                           | <b>0.024</b>     |
| β-blockers                        |                                                           |                                                                                |                                                                               |                                                                   |                  |
| Baseline use                      | 400 (85.1)                                                | 157 (81.8)                                                                     | 78 (86.7)                                                                     | 232 (85.9)                                                        | 0.591            |
| 3-month use                       | 430 (91.5)                                                | 176 (91.7)                                                                     | 87 (96.7)                                                                     | 262 (97.0)                                                        | <b>0.011</b>     |
| 3-month target dose               | 63 (13.4)                                                 | 29 (15.1)                                                                      | 14 (15.6)                                                                     | 35 (13.0)                                                         | 0.866            |
| 3-month optimal dose fraction (%) | 38 ± 31                                                   | 38 ± 31                                                                        | 36 ± 30                                                                       | 38 ± 28                                                           | 0.961            |
| MRA baseline use                  | 241 (51.3)                                                | 105 (54.7)                                                                     | 48 (53.3)                                                                     | 168 (62.2)                                                        | <b>0.038</b>     |
| Loop diuretic baseline use        | 469 (99.8)                                                | 190 (99.0)                                                                     | 90 (100.0)                                                                    | 270 (100.0)                                                       | 0.184            |
| Digoxin baseline use              | 76 (16.2)                                                 | 34 (17.7)                                                                      | 13 (14.4)                                                                     | 62 (23.0)                                                         | 0.097            |

Data are presented as n (%) and mean ± standard deviation.

ACEi = angiotensin-converting enzyme inhibitor; ARB = angiotensin receptor blocker; BMI = body mass index; CABG = coronary artery bypass graft; CKD = chronic kidney disease; COPD = chronic obstructive pulmonary disease; CRT-D = cardiac resynchronization therapy with defibrillator; CRT-P = cardiac resynchronization therapy with pacemaker; HF = heart failure; ICD = implantable cardioverter-defibrillator; MR = mitral regurgitation; MRA = mineralocorticoid receptor antagonist; NYHA = New York Heart Association; PCI = percutaneous coronary intervention.

**Supplementary Table 2 – Echocardiographic data, laboratory characteristics, and QoL measures according to 9-month and baseline moderate-severe MR.**

|                                            | No or Mild MR at Baseline and 9-month – Unchanged (n=470) | Moderate or Severe MR at Baseline, No or Mild MR at 9-month – Improved (n=192) | No or Mild MR at Baseline, Moderate or Severe MR at 9-month – Worsened (n=90) | Moderate or Severe MR at Baseline and 9-month – Unchanged (n=270) | p-value          |
|--------------------------------------------|-----------------------------------------------------------|--------------------------------------------------------------------------------|-------------------------------------------------------------------------------|-------------------------------------------------------------------|------------------|
| <b>Echocardiographic data</b>              |                                                           |                                                                                |                                                                               |                                                                   |                  |
| LVEF (%)                                   |                                                           |                                                                                |                                                                               |                                                                   |                  |
| Baseline                                   | 30 (25-35)                                                | 28 (23-35)                                                                     | 30 (25-36)                                                                    | 30 (23-35)                                                        | <b>0.003</b>     |
| 9-month                                    | 36 (30-45)                                                | 35 (30-45)                                                                     | 30 (25-38)                                                                    | 30 (25-38)                                                        | <b>&lt;0.001</b> |
| LVEF categories                            |                                                           |                                                                                |                                                                               |                                                                   |                  |
| Baseline                                   |                                                           |                                                                                |                                                                               |                                                                   | 0.062            |
| HF <sub>r</sub> EF (LVEF <40%)             | 356 (84.0)                                                | 156 (84.3)                                                                     | 68 (81.0)                                                                     | 230 (88.8)                                                        |                  |
| HF <sub>mr</sub> EF (LVEF 40-49%)          | 52 (12.3)                                                 | 16 (8.7)                                                                       | 14 (16.7)                                                                     | 20 (7.7)                                                          |                  |
| HF <sub>p</sub> EF (LVEF ≥50%)             | 16 (3.8)                                                  | 13 (7.0)                                                                       | 2 (2.4)                                                                       | 9 (3.5)                                                           |                  |
| 9-month                                    |                                                           |                                                                                |                                                                               |                                                                   | <b>&lt;0.001</b> |
| HF <sub>r</sub> EF (LVEF <40%)             | 236 (55.4)                                                | 106 (58.6)                                                                     | 67 (78.8)                                                                     | 202 (77.7)                                                        |                  |
| HF <sub>mr</sub> EF (LVEF 40-49%)          | 123 (28.9)                                                | 44 (24.3)                                                                      | 16 (18.8)                                                                     | 44 (16.9)                                                         |                  |
| HF <sub>p</sub> EF (LVEF ≥50%)             | 67 (15.7)                                                 | 31 (17.1)                                                                      | 2 (2.4)                                                                       | 14 (5.4)                                                          |                  |
| LVEDD (mm)                                 |                                                           |                                                                                |                                                                               |                                                                   |                  |
| Baseline                                   | 61 (56-65)                                                | 63 (58-68)                                                                     | 61 (55-70)                                                                    | 65 (59-70)                                                        | <b>&lt;0.001</b> |
| 9-month                                    | 59 (54-65)                                                | 61 (54-65)                                                                     | 64 (58-70)                                                                    | 64 (58-70)                                                        | <b>&lt;0.001</b> |
| LVESD (mm)                                 |                                                           |                                                                                |                                                                               |                                                                   |                  |
| Baseline                                   | 48 (43-54)                                                | 52 (46-58)                                                                     | 50 (42-56)                                                                    | 53 (47-60)                                                        | <b>&lt;0.001</b> |
| 9-month                                    | 46 (39-52)                                                | 47 (41-53)                                                                     | 52 (44-61)                                                                    | 52 (45-60)                                                        | <b>&lt;0.001</b> |
| Left atrium diameter (mm)                  |                                                           |                                                                                |                                                                               |                                                                   |                  |
| Baseline                                   | 45 (40-50)                                                | 47 (43-52)                                                                     | 45 (42-50)                                                                    | 49 (45-55)                                                        | <b>&lt;0.001</b> |
| 9-month                                    | 44 (40-50)                                                | 44 (40-49)                                                                     | 47 (44-52)                                                                    | 49 (45-54)                                                        | <b>&lt;0.001</b> |
| <b>Laboratory data</b>                     |                                                           |                                                                                |                                                                               |                                                                   |                  |
| Creatinine (μmol/L)                        |                                                           |                                                                                |                                                                               |                                                                   |                  |
| Baseline                                   | 97 (81-123)                                               | 96 (79-123)                                                                    | 97 (80-120)                                                                   | 106 (84-129)                                                      | 0.263            |
| 9-month                                    | 104 (81-129)                                              | 106 (88-133)                                                                   | 99 (81-122)                                                                   | 104 (88-137)                                                      | 0.233            |
| eGFR CKD-EPI (mL/min/1.73 m <sup>2</sup> ) |                                                           |                                                                                |                                                                               |                                                                   |                  |
| Baseline                                   | 65 (49-83)                                                | 64 (49-84)                                                                     | 64 (47-77)                                                                    | 60 (43-79)                                                        | 0.095            |
| 9-month                                    | 60 (46-81)                                                | 60 (43-78)                                                                     | 61 (44-78)                                                                    | 59 (42-75)                                                        | 0.280            |
| Urea (mmol/L)                              |                                                           |                                                                                |                                                                               |                                                                   |                  |
| Baseline                                   | 9.8 (7.1-15.7)                                            | 10.2 (7.0-15.4)                                                                | 10.5 (7.4-15.7)                                                               | 11.0 (7.4-18.2)                                                   | 0.352            |
| 9-month                                    | 9.8 (6.7-15.5)                                            | 10.9 (7.9-15.0)                                                                | 9.5 (7.0-18.1)                                                                | 10.3 (7.3-17.9)                                                   | 0.412            |
| Sodium (mmol/L)                            |                                                           |                                                                                |                                                                               |                                                                   |                  |
| Baseline                                   | 140 (137-142)                                             | 140 (138-142)                                                                  | 140 (138-142)                                                                 | 140 (137-142)                                                     | 0.771            |
| 9-month                                    | 140 (138-142)                                             | 140 (138-142)                                                                  | 140 (138-142)                                                                 | 139 (137-142)                                                     | 0.840            |
| NT-proBNP (ng/L)                           |                                                           |                                                                                |                                                                               |                                                                   |                  |
| Baseline                                   | 1718 (739-4333)                                           | 2374 (1087-4884)                                                               | 2554 (1064-5671)                                                              | 2778 (1276-5119)                                                  | <b>&lt;0.001</b> |
| 9-month                                    | 811 (289-1882)                                            | 748 (247-1894)                                                                 | 1515 (619-2914)                                                               | 1708 (807-3838)                                                   | <b>&lt;0.001</b> |
| <b>QoL measures</b>                        |                                                           |                                                                                |                                                                               |                                                                   |                  |
| 6MWT distance (m)                          |                                                           |                                                                                |                                                                               |                                                                   |                  |
| Baseline                                   | 288 (33-390)                                              | 306 (67-400)                                                                   | 258 (43-381)                                                                  | 268 (120-360)                                                     | 0.473            |
| 9-month                                    | 352 (218-465)                                             | 390 (286-460)                                                                  | 336 (206-434)                                                                 | 312 (200-410)                                                     | <b>&lt;0.001</b> |
| KCCQ clinical summary score                |                                                           |                                                                                |                                                                               |                                                                   |                  |
| Baseline                                   | 56 (36-75)                                                | 54 (32-71)                                                                     | 49 (36-70)                                                                    | 51 (32-70)                                                        | 0.254            |
| 9-month                                    | 71 (51-87)                                                | 79 (57-92)                                                                     | 61 (45-87)                                                                    | 64 (46-81)                                                        | <b>&lt;0.001</b> |
| KCCQ overall summary score                 |                                                           |                                                                                |                                                                               |                                                                   |                  |
| Baseline                                   | 56 (39-73)                                                | 53 (33-70)                                                                     | 52 (38-69)                                                                    | 52 (35-70)                                                        | 0.204            |
| 9-month                                    | 71 (52-86)                                                | 77 (59-90)                                                                     | 63 (48-83)                                                                    | 64 (47-79)                                                        | <b>&lt;0.001</b> |
| EQ-5D index value                          |                                                           |                                                                                |                                                                               |                                                                   |                  |
| Baseline                                   | 0.74 (0.62-0.84)                                          | 0.77 (0.65-0.84)                                                               | 0.74 (0.57-0.86)                                                              | 0.74 (0.57-0.81)                                                  | 0.881            |
| 9-month                                    | 0.78 (0.66-0.90)                                          | 0.81 (0.69-1.00)                                                               | 0.74 (0.57-0.90)                                                              | 0.77 (0.65-0.86)                                                  | <b>0.002</b>     |
| EQ-5D VAS                                  |                                                           |                                                                                |                                                                               |                                                                   |                  |
| Baseline                                   | 60 (45-70)                                                | 60 (45-70)                                                                     | 50 (40-70)                                                                    | 55 (40-70)                                                        | 0.102            |
| 9-month                                    | 65 (50-80)                                                | 70 (55-80)                                                                     | 60 (40-75)                                                                    | 60 (50-77)                                                        | <b>&lt;0.001</b> |

Data are presented as n (%) and median (Q25-Q75).

6MWT = 6-minute walking test; CKD-EPI = Chronic Kidney Disease Epidemiology Collaboration; eGFR = estimated glomerular filtration rate; EQ-5D = EuroQol - 5 Dimension; HF<sub>mr</sub>EF = heart failure with mid-range ejection fraction; HF<sub>p</sub>EF = heart failure with preserved ejection fraction; HF<sub>r</sub>EF = heart failure with reduced ejection fraction; KCCQ = Kansas City Cardiomyopathy Questionnaire; LVEDD = left ventricular end-diastolic diameter; LVEF = left ventricular ejection fraction; LVESD = left ventricular end-systolic

diameter; MR = mitral regurgitation; NT-proBNP = N-terminal pro-B-type natriuretic peptide; QoL = quality-of-life; VAS = Visual Analogue Scale.

**Supplementary Table 3 – Clinical characteristics among patients included vs. not included in the study.**

|                                   | Included<br>(n=1022) | Excluded<br>(n=1494) | p-value |
|-----------------------------------|----------------------|----------------------|---------|
| Age (years)                       | 66.9 ± 12.2          | 70.2 ± 11.6          | <0.001  |
| Men                               | 786 (76.9)           | 1060 (71.0)          | 0.001   |
| BMI (kg/m <sup>2</sup> )          | 27.8 ± 5.4           | 27.9 ± 5.6           | 0.688   |
| HF hospitalization in last year   | 284 (27.8)           | 510 (34.1)           | 0.001   |
| Primary ischemic HF aetiology     | 442 (43.9)           | 684 (46.7)           | 0.175   |
| Medical history                   |                      |                      |         |
| Hypertension                      | 629 (61.6)           | 940 (62.9)           | 0.485   |
| Diabetes mellitus                 | 285 (27.9)           | 534 (35.7)           | 0.001   |
| Atrial fibrillation               | 410 (40.1)           | 733 (49.1)           | <0.001  |
| Myocardial infarction             | 369 (36.1)           | 594 (39.8)           | 0.064   |
| PCI                               | 207 (20.3)           | 337 (22.6)           | 0.168   |
| CABG                              | 149 (14.6)           | 284 (19.0)           | 0.004   |
| Prior valve surgery               | 74 (7.2)             | 105 (7.0)            | 0.839   |
| Peripheral artery disease         | 90 (8.8)             | 183 (12.3)           | 0.006   |
| COPD                              | 154 (15.1)           | 282 (18.9)           | 0.013   |
| Stroke                            | 93 (9.1)             | 140 (9.4)            | 0.818   |
| Current malignancy                | 27 (2.6)             | 70 (4.7)             | 0.009   |
| CKD                               | 231 (22.6)           | 465 (31.1)           | <0.001  |
| Device therapy                    |                      |                      | 0.151   |
| Pacemaker                         | 67 (6.6)             | 116 (7.8)            |         |
| ICD                               | 67 (6.6)             | 138 (9.2)            |         |
| CRT-P                             | 19 (1.9)             | 30 (2.0)             |         |
| CRT-D                             | 71 (7.0)             | 102 (6.8)            |         |
| Type of baseline visit            |                      |                      | <0.001  |
| Inpatient hospitalization         | 617 (60.4)           | 1077 (72.1)          |         |
| Outpatient clinic                 | 405 (39.6)           | 417 (27.9)           |         |
| Reason for baseline visit         |                      |                      | <0.001  |
| Worsening HF                      | 444 (43.4)           | 928 (62.1)           |         |
| New-onset HF                      | 311 (30.4)           | 391 (26.2)           |         |
| Other                             | 267 (26.1)           | 175 (11.7)           |         |
| NYHA class                        |                      |                      | <0.001  |
| Baseline                          |                      |                      |         |
| I                                 | 24 (2.4)             | 32 (2.2)             |         |
| II                                | 454 (45.3)           | 414 (28.7)           |         |
| III                               | 436 (43.5)           | 792 (54.9)           |         |
| IV                                | 89 (8.9)             | 205 (14.2)           |         |
| 9-month                           |                      |                      | 0.001   |
| I                                 | 190 (19.2)           | 126 (13.6)           |         |
| II                                | 569 (57.4)           | 538 (58.1)           |         |
| III                               | 219 (22.1)           | 254 (27.4)           |         |
| IV                                | 14 (1.4)             | 8 (0.9)              |         |
| SBP                               |                      |                      |         |
| Baseline                          | 125 ± 22             | 124 ± 22             | 0.528   |
| 9-month                           | 124 ± 21             | 125 ± 20             | 0.704   |
| HF therapy                        |                      |                      |         |
| ACEi/ARB                          |                      |                      |         |
| Baseline use                      | 802 (78.5)           | 1018 (68.1)          | <0.001  |
| 3-month use                       | 934 (91.4)           | 1259 (84.3)          | <0.001  |
| 3-month target dose               | 270 (26.4)           | 276 (18.5)           | <0.001  |
| 3-month optimal dose fraction (%) | 53 ± 40              | 44 ± 36              | <0.001  |
| β-blockers                        |                      |                      |         |
| Baseline use                      | 867 (84.8)           | 1226 (82.1)          | 0.068   |
| 3-month use                       | 955 (93.4)           | 1342 (89.8)          | 0.002   |
| 3-month target dose               | 141 (13.8)           | 178 (11.9)           | 0.163   |
| 3-month optimal dose fraction (%) | 38 ± 30              | 35 ± 31              | 0.015   |
| MRA baseline use                  | 562 (55.0)           | 777 (52.0)           | 0.141   |
| Loop diuretic baseline use        | 1019 (99.7)          | 1485 (99.4)          | 0.269   |
| Digoxin baseline use              | 185 (18.1)           | 306 (20.5)           | 0.139   |

Data are presented as n (%) and mean ± standard deviation.

ACEi = angiotensin-converting enzyme inhibitor; ARB = angiotensin receptor blocker; BMI = body mass index; CABG = coronary artery bypass graft; CKD = chronic kidney disease; COPD = chronic obstructive pulmonary disease; CRT-D = cardiac resynchronization therapy with defibrillator; CRT-P = cardiac resynchronization therapy with pacemaker; HF = heart failure; ICD =

implantable cardioverter-defibrillator; MR = mitral regurgitation; MRA = mineralocorticoid receptor antagonist; NYHA = New York Heart Association; PCI = percutaneous coronary intervention; SBP = systolic blood pressure.

**Supplementary Table 4 – Multivariable binary logistic regression analysis for the predictors of persistent moderate-severe MR (among patients with moderate-severe MR at baseline).**

|                                                 | Univariable analysis |                 | Multivariable analysis |                 |
|-------------------------------------------------|----------------------|-----------------|------------------------|-----------------|
|                                                 | OR (95% CI)          | <i>p</i> -value | OR (95% CI)            | <i>p</i> -value |
| Age (years)                                     | 1.03 (1.01-1.04)     | <b>0.001</b>    | 1.02 (1.00-1.05)       | <b>0.029</b>    |
| Sex (women)                                     | 0.85 (0.55-1.30)     | 0.447           | 0.95 (0.57-1.60)       | 0.857           |
| Primary ischemic HF etiology                    | 1.52 (1.03-2.23)     | <b>0.033</b>    | 1.53 (0.98-2.38)       | 0.061           |
| Previous HF hospitalization in last year        | 1.23 (0.81-1.85)     | 0.330           | 0.84 (0.54-1.29)       | 0.423           |
| NYHA class III or IV                            | 0.94 (0.65-1.37)     | 0.762           | 0.98 (0.62-1.57)       | 0.949           |
| eGFR CKD-EPI (mL/min/1.73 m <sup>2</sup> )      | 0.99 (0.98-1.00)     | 0.070           | 1.00 (0.99-1.01)       | 0.733           |
| Log-NT-proBNP (ng/L)                            | 1.09 (0.92-1.29)     | 0.324           | 1.02 (0.83-1.26)       | 0.815           |
| LVEF categories                                 |                      |                 |                        |                 |
| HF <sub>r</sub> EF (LVEF <40%) – reference      | -                    | -               | -                      | -               |
| HF <sub>mr</sub> EF (LVEF 40-49%)               | 0.85 (0.43-1.69)     | 0.638           | 0.59 (0.27-1.27)       | 0.178           |
| HF <sub>p</sub> EF (LVEF ≥50%)                  | 0.47 (0.20-1.13)     | 0.090           | 0.37 (0.14-1.00)       | <b>0.049</b>    |
| ACEi/ARB optimal dose fraction at 3 months (%)  | 0.56 (0.35-0.90)     | <b>0.017</b>    | 0.54 (0.31-0.94)       | <b>0.030</b>    |
| β-blocker optimal dose fraction at 3 months (%) | 1.00 (0.53-1.90)     | 0.990           | 1.20 (0.58-2.49)       | 0.619           |

Data are presented as OR and 95% CI. The *C*-statistic for the multivariable model is 0.63, the Hosmer-Lemeshow goodness-of-fit test *p*-value is 0.32.

ACEi = angiotensin-converting enzyme inhibitor; ARB = angiotensin receptor blocker; CI = confidence interval; CKD-EPI = Chronic Kidney Disease Epidemiology Collaboration; eGFR = estimated glomerular filtration rate; HF = heart failure; HF<sub>mr</sub>EF = heart failure with mid-range ejection fraction; HF<sub>p</sub>EF = heart failure with preserved ejection fraction; HF<sub>r</sub>EF = heart failure with reduced ejection fraction; LVEF = left ventricular ejection fraction; MR = mitral regurgitation; NYHA = New York Heart Association; NT-proBNP = N-terminal pro-B-type natriuretic peptide; OR = odds ratio.

**Supplementary Table 5 – Multivariable binary logistic regression analysis for the predictors of worsening MR (among patients with no or mild MR at baseline).**

|                                                 | Univariable analysis |                | Multivariable analysis |              |
|-------------------------------------------------|----------------------|----------------|------------------------|--------------|
|                                                 | OR (95% CI)          | p-value        | OR (95% CI)            | p-value      |
| Age (years)                                     | 1.04 (1.02-1.06)     | < <b>0.001</b> | 1.05 (1.02-1.08)       | <b>0.001</b> |
| Sex (women)                                     | 1.44 (0.86-2.40)     | 0.162          | 1.28 (0.69-2.36)       | 0.433        |
| Primary ischemic HF etiology                    | 1.36 (0.86-2.13)     | 0.186          | 1.17 (0.69-2.00)       | 0.562        |
| Previous HF hospitalization in last year        | 1.37 (0.84-2.23)     | 0.205          | 1.48 (0.84-2.59)       | 0.175        |
| NYHA class III or IV                            | 1.41 (0.89-2.24)     | 0.138          | 1.22 (0.71-2.11)       | 0.476        |
| eGFR CKD-EPI (mL/min/1.73 m <sup>2</sup> )      | 1.00 (0.98-1.01)     | 0.350          | 1.01 (0.99-1.02)       | 0.255        |
| Log-NT-proBNP (ng/L)                            | 1.23 (1.02-1.49)     | <b>0.030</b>   | 1.14 (0.91-1.44)       | 0.257        |
| LVEF categories                                 |                      |                |                        |              |
| HF <sub>r</sub> EF (LVEF <40%) – reference      | -                    | -              | -                      | -            |
| HF <sub>mr</sub> EF (LVEF 40-49%)               | 1.41 (0.74-2.69)     | 0.297          | 1.18 (0.56-2.48)       | 0.672        |
| HF <sub>p</sub> EF (LVEF ≥50%)                  | 0.65 (0.15-2.91)     | 0.578          | 0.42 (0.09-2.03)       | 0.283        |
| ACEi/ARB optimal dose fraction at 3 months (%)  | 0.61 (0.33-1.10)     | 0.100          | 0.70 (0.34-1.43)       | 0.327        |
| β-blocker optimal dose fraction at 3 months (%) | 0.84 (0.40-1.77)     | 0.641          | 0.78 (0.33-1.87)       | 0.580        |

Data are presented as OR and 95% CI. The C-statistic for the multivariable model is 0.68, the Hosmer-Lemeshow goodness-of-fit test p-value is 0.52.

ACEi = angiotensin-converting enzyme inhibitor; ARB = angiotensin receptor blocker; CI = confidence interval; CKD-EPI = Chronic Kidney Disease Epidemiology Collaboration; eGFR = estimated glomerular filtration rate; HF = heart failure; HF<sub>mr</sub>EF = heart failure with mid-range ejection fraction; HF<sub>p</sub>EF = heart failure with preserved ejection fraction; HF<sub>r</sub>EF = heart failure with reduced ejection fraction; LVEF = left ventricular ejection fraction; MR = mitral regurgitation; NYHA = New York Heart Association; NT-proBNP = N-terminal pro-B-type natriuretic peptide; OR = odds ratio.



**Supplementary Figure 1 – Study flow-chart.**

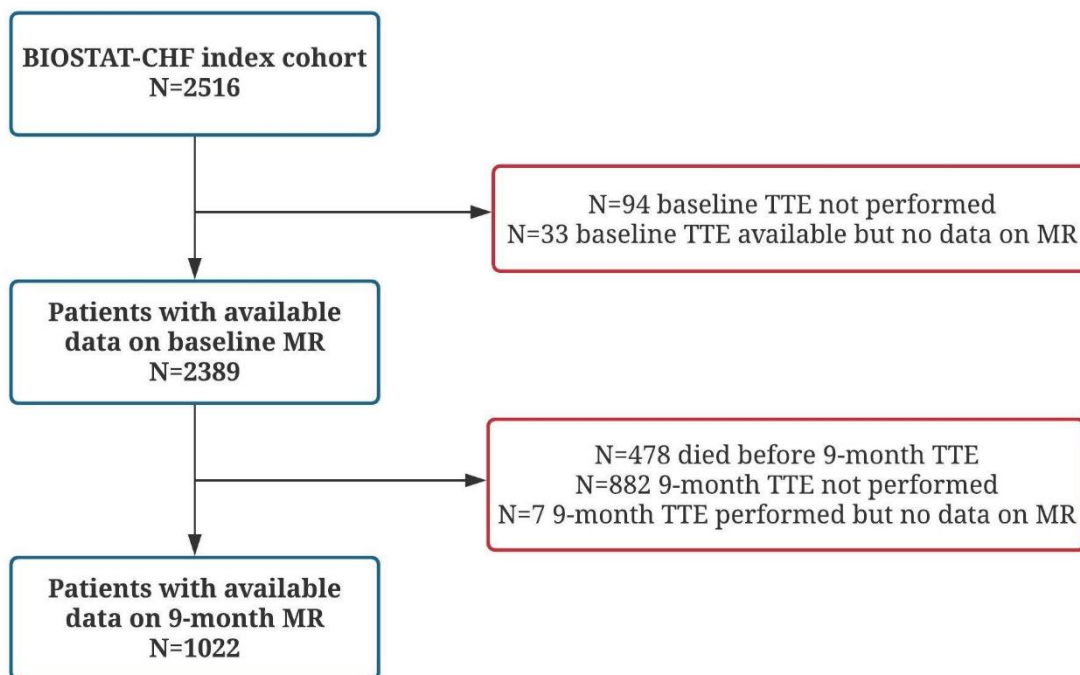

The figure shows the flow-chart of included patients from BIOSAT-CHF index cohort.

MR = mitral regurgitation; TTE = transthoracic echocardiography.

**Supplementary Figure 2 – All-cause mortality.**

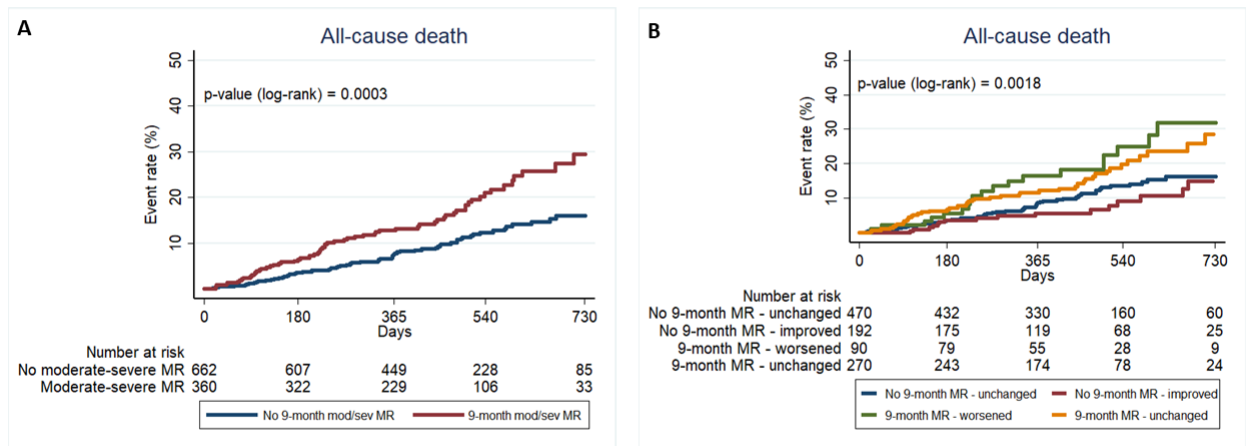

The figure shows Kaplan-Meier curves for 2-year all-cause mortality in patients with vs. without 9-month moderate-severe MR (panel A) and in four patients' groups according to baseline and 9-month moderate-severe MR after GRMT optimization (panel B).

GRMT = guideline-directed medical therapy; MR = mitral regurgitation.

**Supplementary Figure 3 – Cardiovascular mortality.**

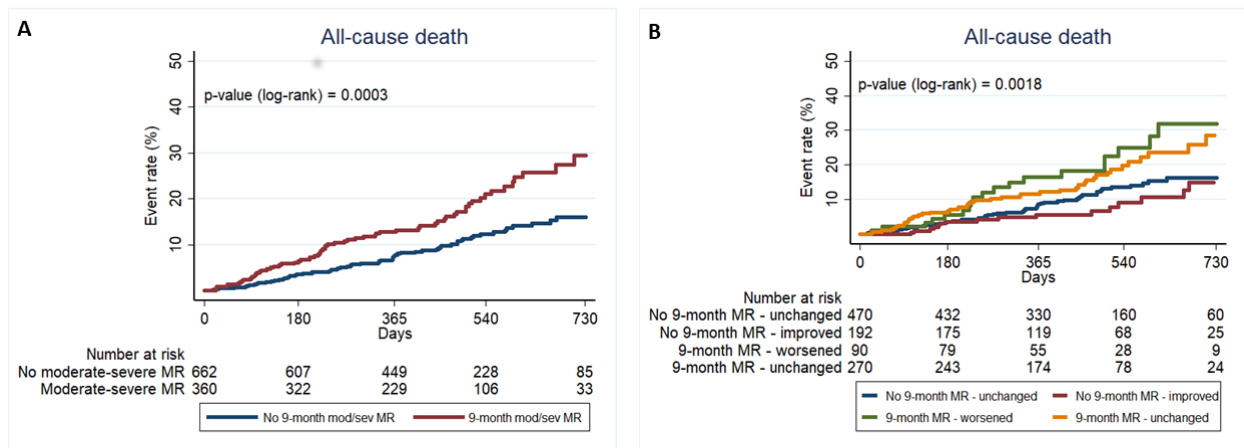

The figure shows Kaplan-Meier curves for 2-year cardiovascular mortality in patients with vs. without 9-month moderate-severe MR (panel A) and in four patients' groups according to baseline and 9-month moderate-severe MR after GRMT optimization (panel B).

GRMT = guideline-directed medical therapy; MR = mitral regurgitation.

**Supplementary Figure 4 – HF hospitalization.**

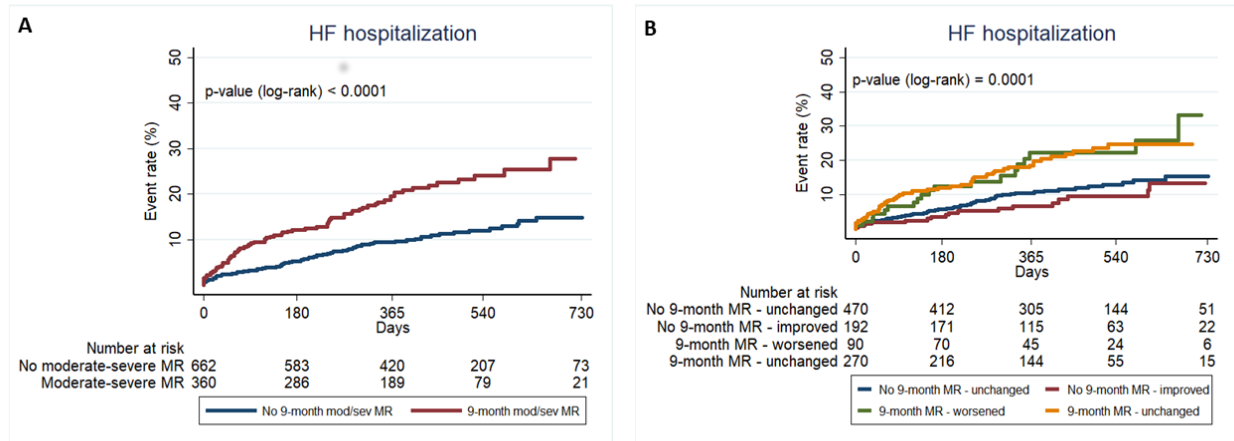

The figure shows Kaplan-Meier curves for 2-year HF hospitalization in patients with vs. without 9-month moderate-severe MR (panel A) and in four patients' groups according to baseline and 9-month moderate-severe MR after GRMT optimization (panel B).

GRMT = guideline-directed medical therapy; HF = heart failure; MR = mitral regurgitation.

**Supplementary Figure 5 – Primary endpoint in LVEF subgroups.**

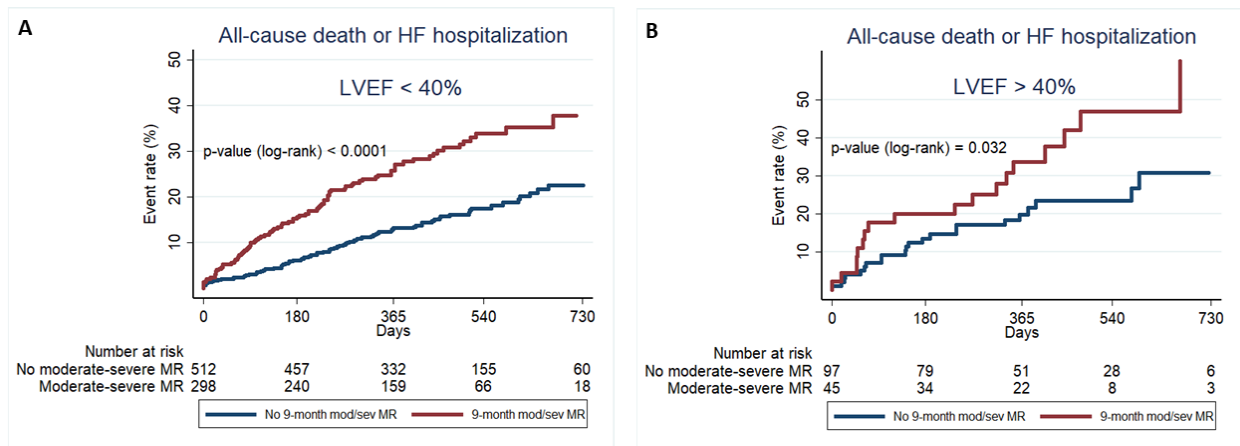

The figure shows Kaplan-Meier curves for 2-year primary endpoint (all-cause mortality or HF hospitalization) in patients with vs. without 9-month moderate-severe MR in the subgroup with LVEF <40% (panel A) and in the subgroup with LVEF  $\geq$ 40% (panel B).

GRMT = guideline-directed medical therapy; HF = heart failure; LVEF = left ventricular ejection fraction; MR = mitral regurgitation.
